# Supplementary material for: The Cysteine Protease Giardipain-1 from Giardia duodenalis Contributes to a Disruption of Intestinal Homeostasis
Source: MDPI journal article supplement (doi:10.3390/ijms232113649), 2022-11-07
Supplement: s1 [file s1]

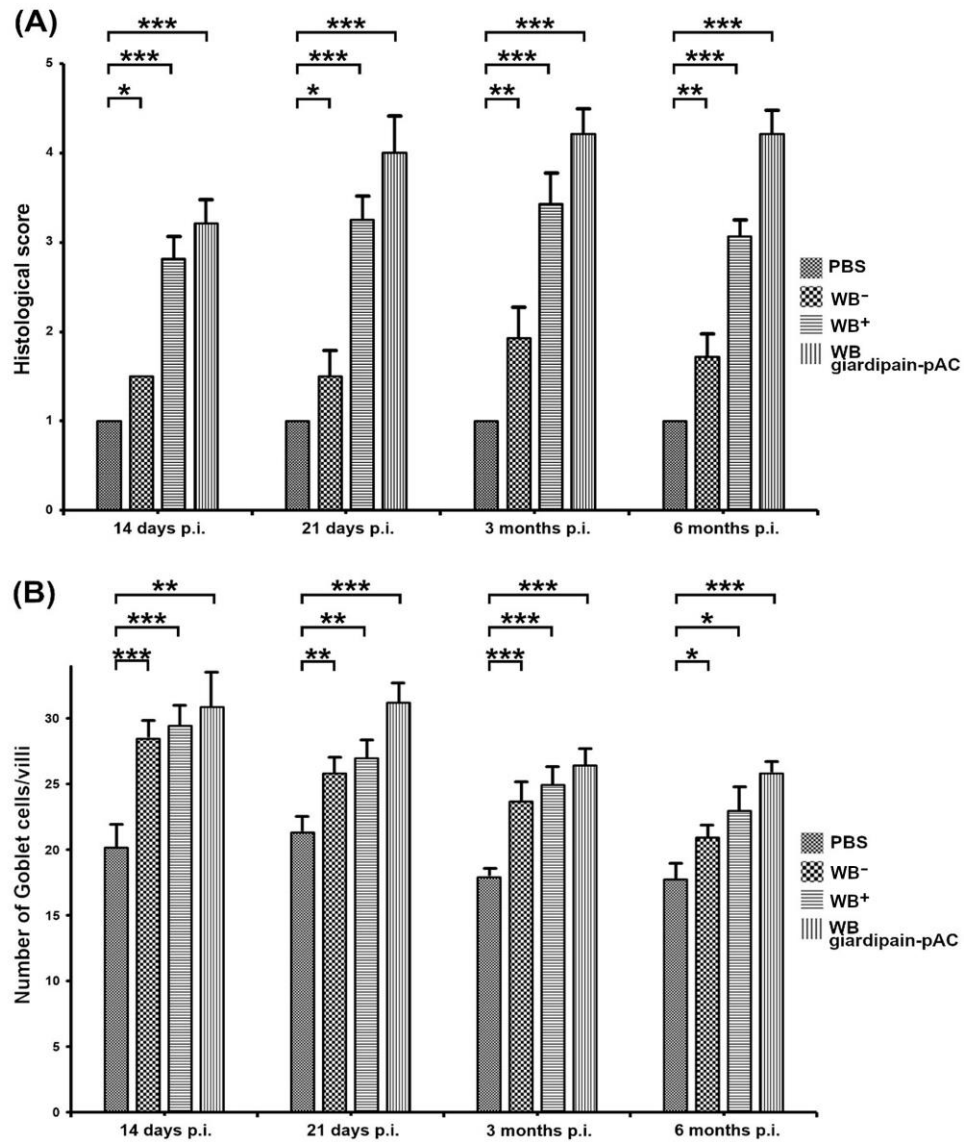

**Supplementary Figure S1.** A) Histological scores for jirds given PBS (control) or infected with WB+ or WB giardipain-pAC trophozoites for periods of 14 days, 21 days, 3 months and 6 months p.i. B) Quantitative analysis of the number of goblet cells in the villi of the duodenum sections of jirds that were given PBS (control) or infected with WB+ or WB giardipain-pAC. PAS-AB staining, 300  $\mu$ m and 100  $\mu$ m scale bar. Results are expressed as mean  $\pm$  S.E. \* $p < 0.05$ , \*\* $p < 0.01$ , \*\*\* $p < 0.001$ .
